# Supplementary material for: Low-viscosity matrix suspension culture enables scalable analysis of patient-derived organoids and tumoroids from the large intestine
Source: PubMed Central journal article supplement (PMC8438070; doi:10.1038/s42003-021-02607-y), 2021-09-13
Supplement: 42003_2021_2607_MOESM1_ESM.pdf [file 42003_2021_2607_MOESM1_ESM.pdf]

## SUPPLEMENTARY FIGURES

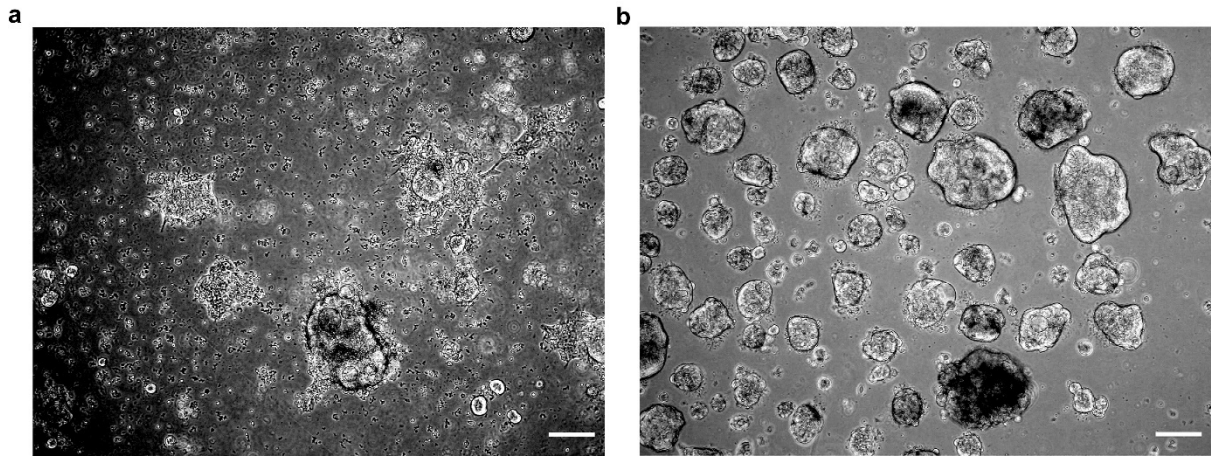

**Supplementary Fig 1. Colorectal tumoroids grown in low-viscosity matrix suspension culture without and with repeated agitation.** Representative images of tumoroids grown (a) without and (b) with gentle agitation by pipetting every 2-3 days; scale bars, 100  $\mu\text{m}$ .

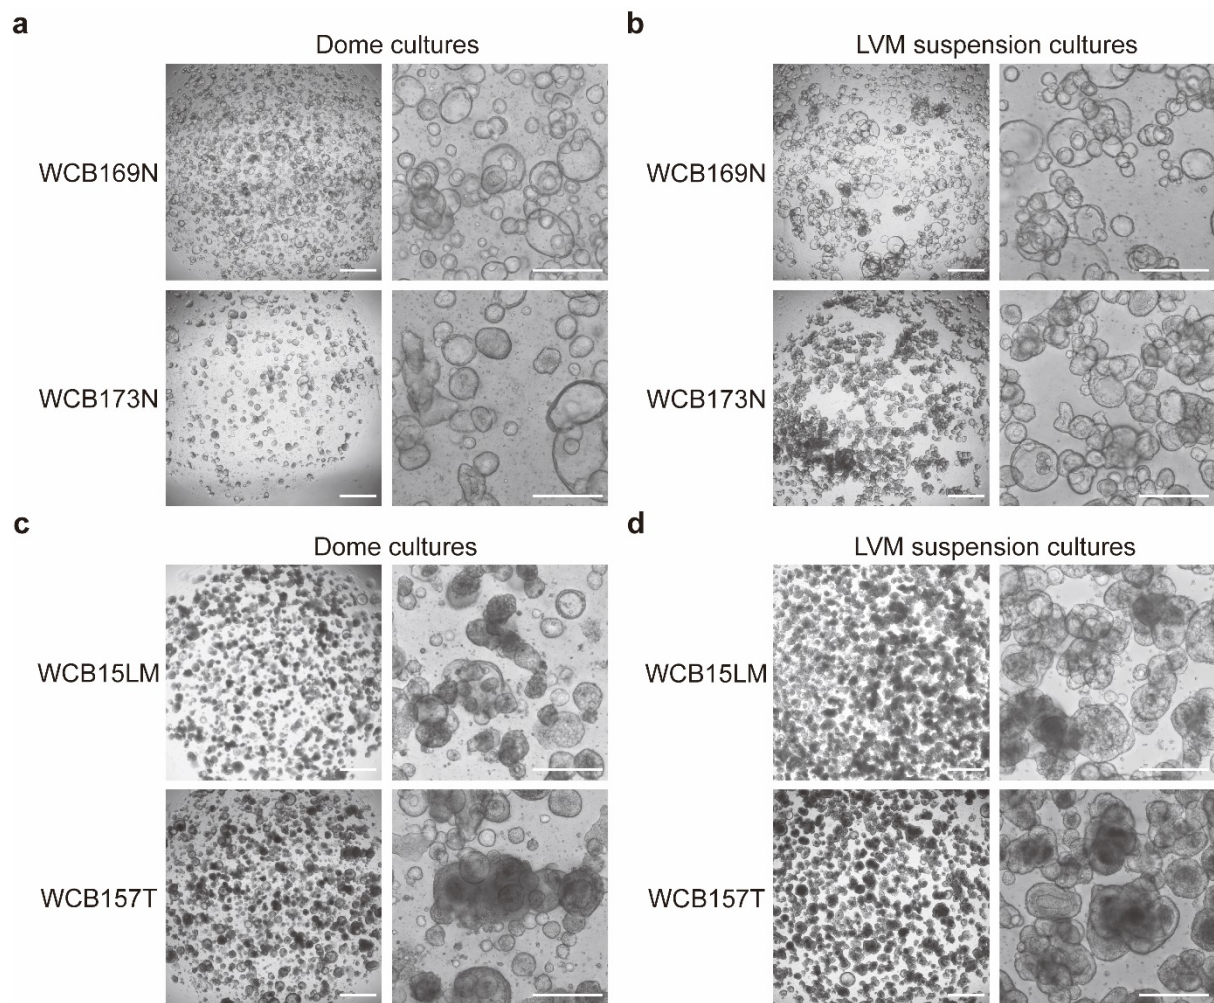

**Supplementary Fig. 2. Low-viscosity matrix suspension culture for propagation of organoids and tumoroids from the human large intestine. a-b,** Representative images of two independent normal colorectal organoids grown for 14 days in **(a)** Matrigel dome culture and **(b)** LVM suspension culture. **c-d,** Representative images of two independent colorectal tumoroids grown for 14 days in **(c)** Matrigel dome culture and **(d)** LVM suspension culture; low-magnification images, scale bars, 500  $\mu\text{m}$ ; high-magnification images, scale bars, 200  $\mu\text{m}$ . N, normal; T, tumor; LM, liver metastasis.

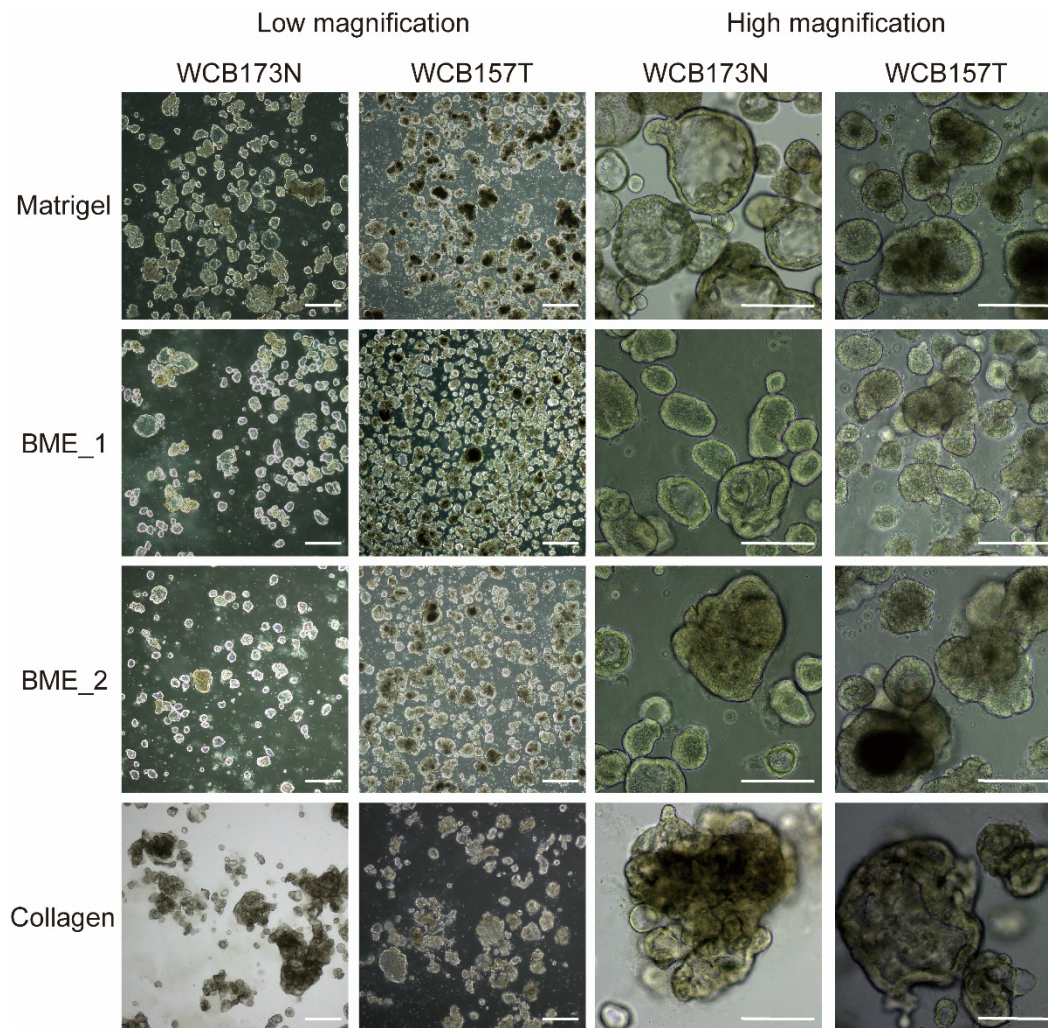

**Supplementary Fig. 3. Low-viscosity matrix suspension cultures of both colorectal organoids and tumoroids using different types of support matrices.** Matched organoids and tumoroids from a representative patient were grown for 14 days as suspension cultures in 5% Matrigel, BME-1, BME-2 or collagen type 1A; low-magnification images, scale bars, 500  $\mu\text{m}$ ; high-magnification images, scale bars, 200  $\mu\text{m}$ . N, normal; T, tumor.



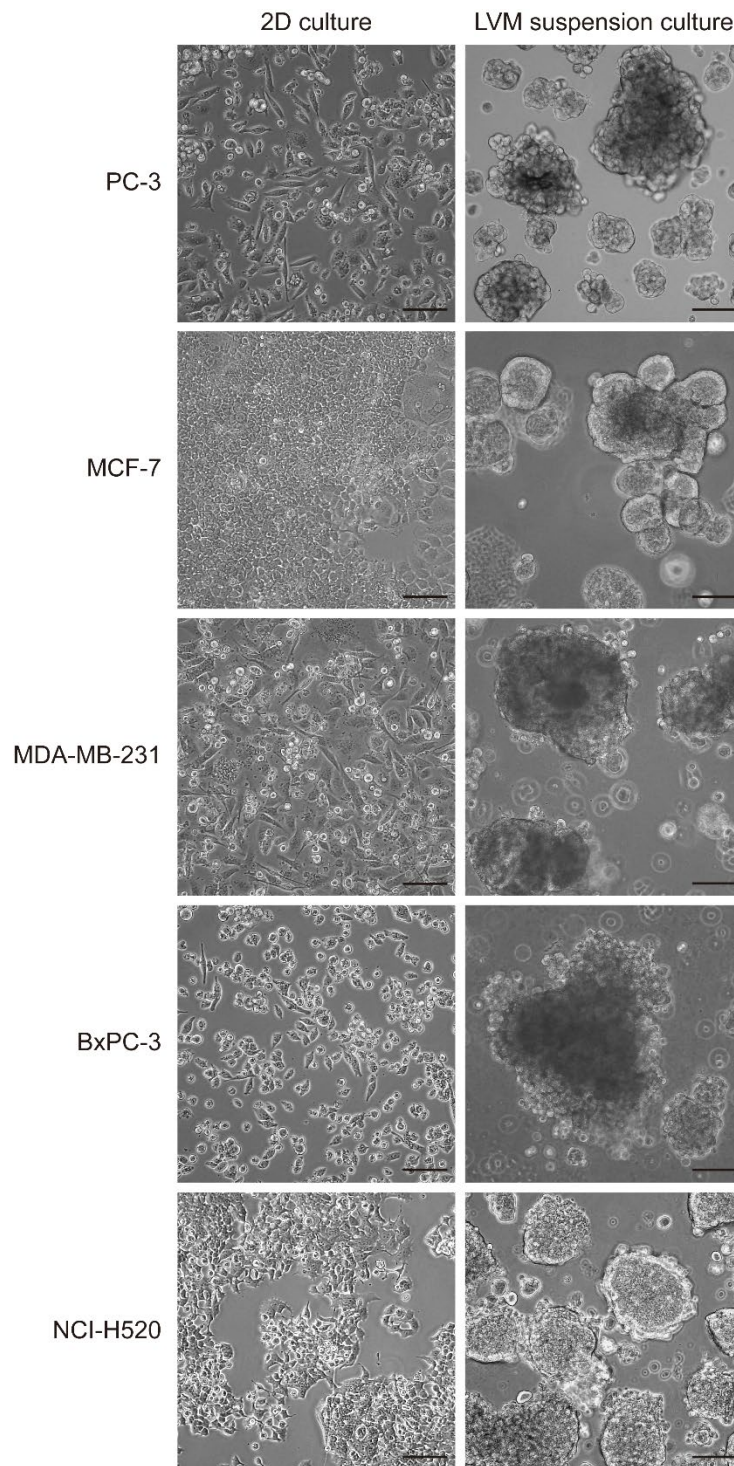

**Supplementary Fig. 4. Low-viscosity suspension culture conditions support three-dimensional growth of human cancer cell lines.** Representative images from human cancer cell lines from prostate (PC-3), breast (MCF-7, MDA-MB-231), pancreas (BxPC-3) and lung (NCI-H520) grown for 7 to 10 days in classic 2-D conditions and LVM suspension conditions; scale bars, 100  $\mu$ m.

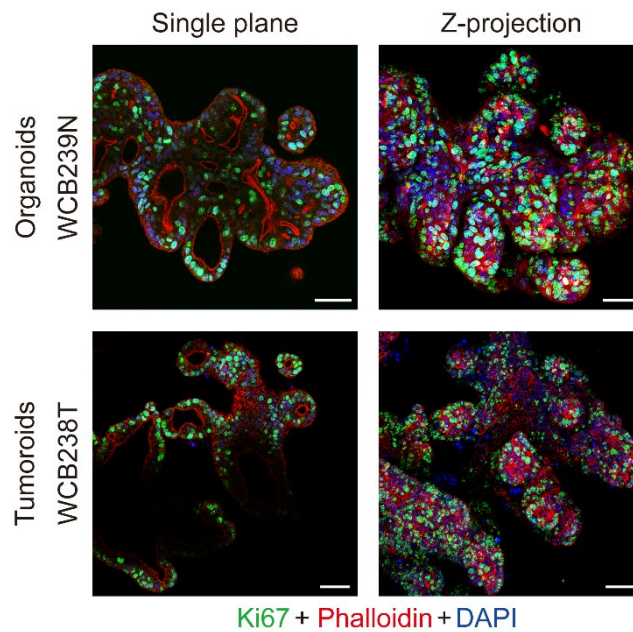

**Supplementary Fig. 5. Morphology of colorectal organoids and tumoroids grown as dome cultures.** Representative immunofluorescence microscopy images of organoids and tumoroids stained with Ki67 antibodies (green), phalloidin (for actin, red) and DAPI (blue); scale bars, 50  $\mu\text{m}$ . N, normal; T, tumor.

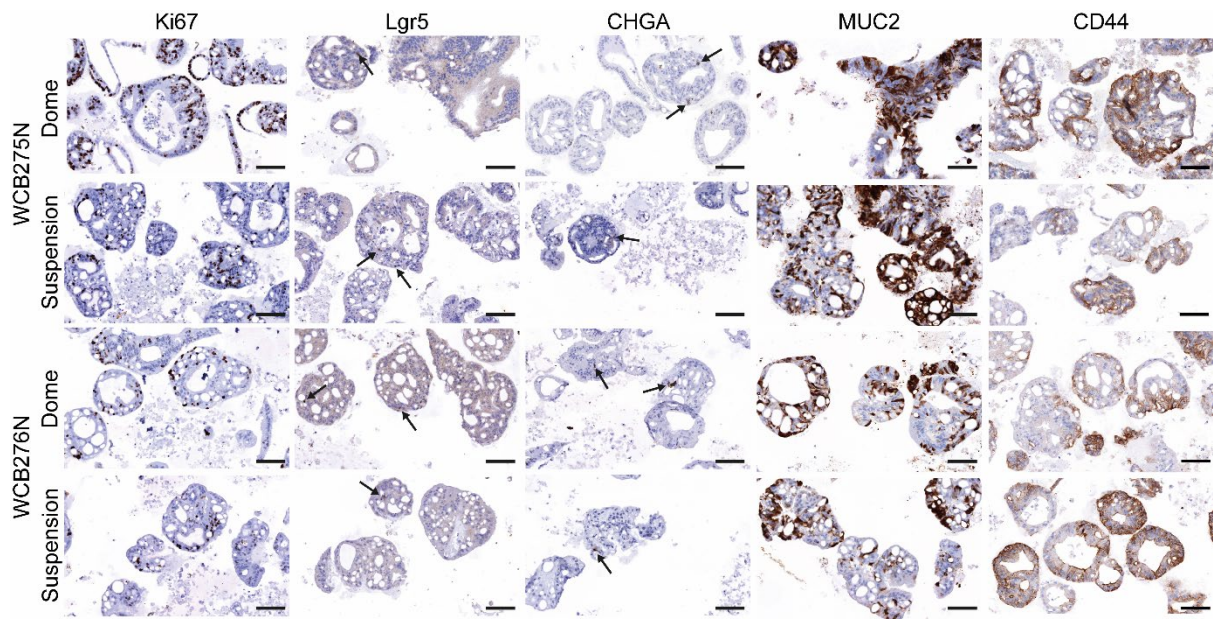

**Supplementary Fig. 6. Marker expression for colorectal organoids grown as low-viscosity suspension or dome cultures.** Immunohistochemistry for organoids from two patients stained for Lgr5, CD44, Ki67, MUC2 and CHGA; scale bars, 100  $\mu$ m. N, normal.



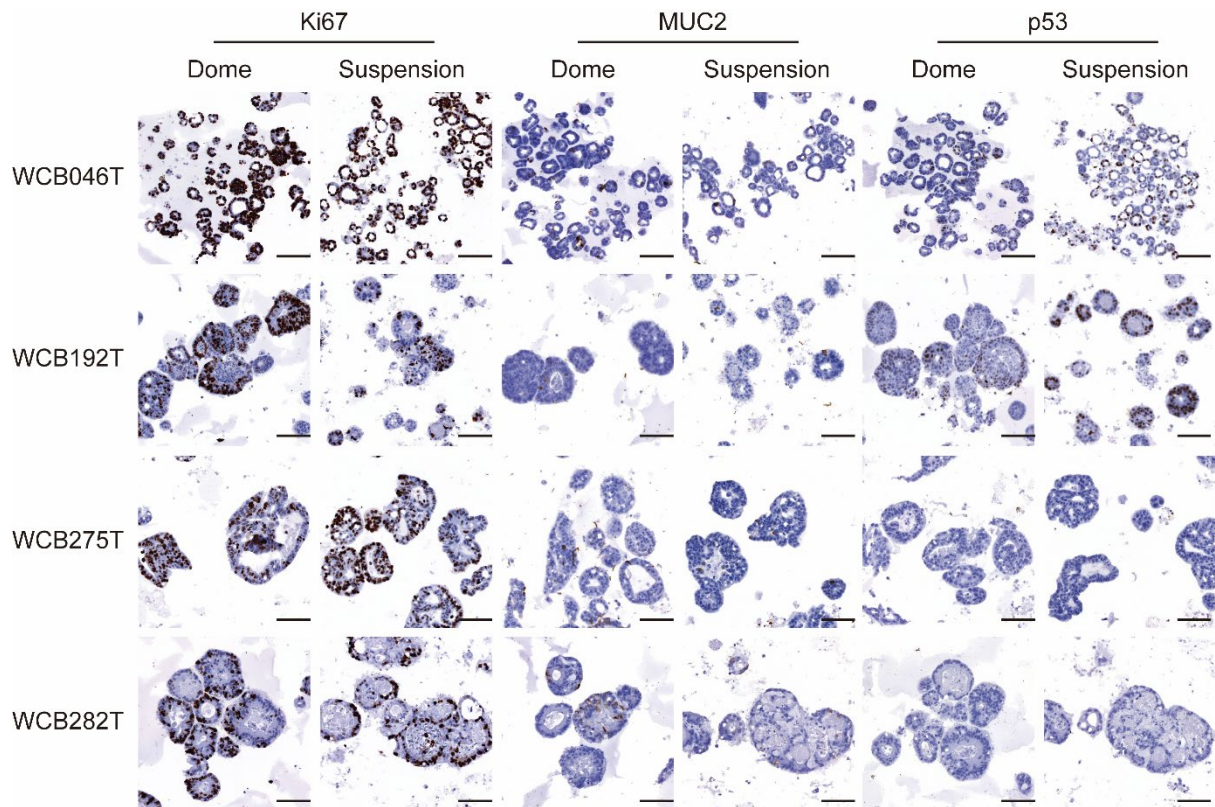

**Supplementary Fig. 7.** Immunohistochemistry for tumoroids from four patients stained for Ki67, MUC2 and p53; scale bars, 100  $\mu$ m. T, tumor.

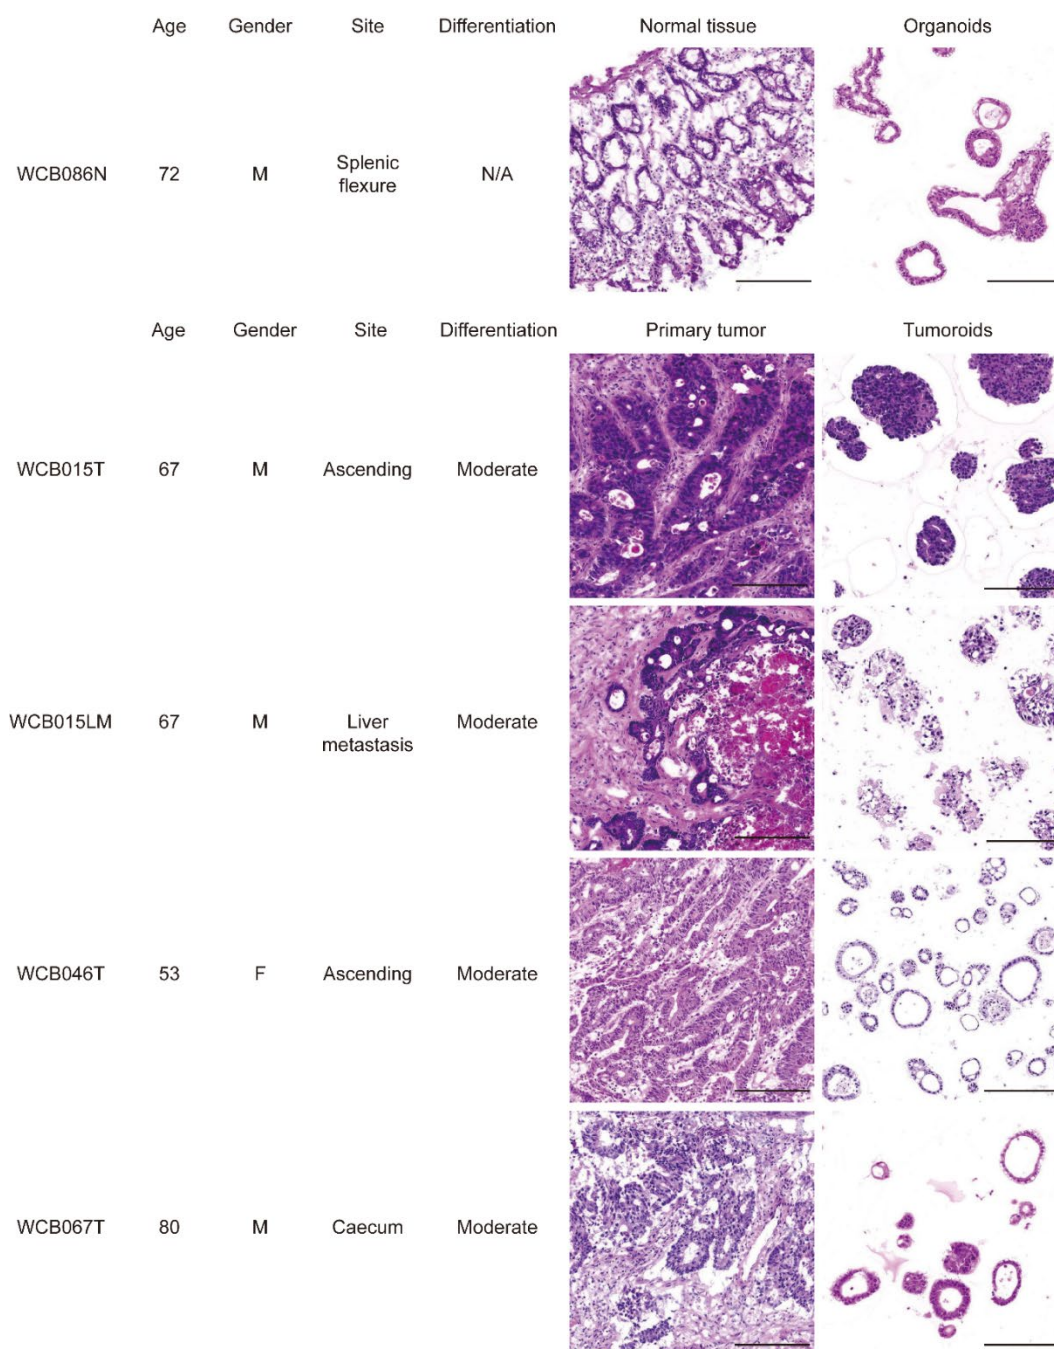

**Supplementary Fig. 8. Colorectal organoids and tumoroids grown in low-viscosity matrix suspension culture maintain histopathological similarities as compared to the original primary tissues.** Representative hematoxylin and eosin stained sections of matched normal tissue and organoids or matched tumor tissue and tumoroids from 5 patients; scale bars, 200  $\mu$ m. N, normal; T, tumor; LM, liver metastasis.



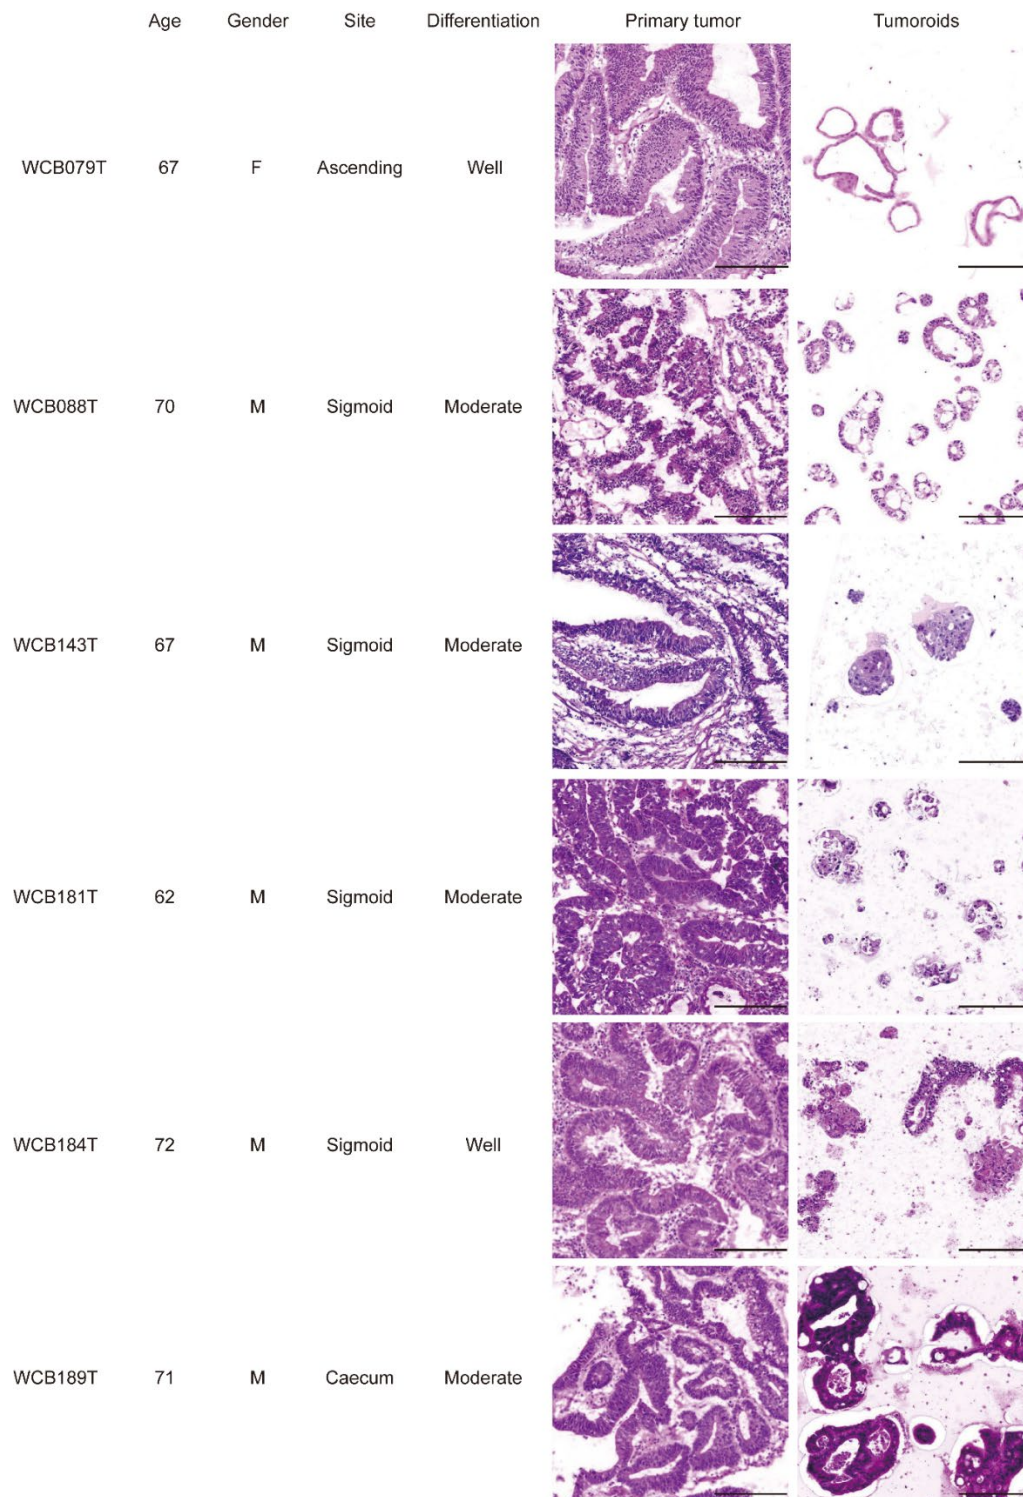

**Supplementary Fig. 9. Colorectal organoids and tumoroids grown in low-viscosity matrix suspension culture maintain histopathological similarities as compared to the original primary tissues.** Representative hematoxylin and eosin stained sections of matched tumor tissue and tumoroids from 6 patients; scale bars, 200  $\mu$ m. N, normal; T, tumor; LM, liver metastasis.

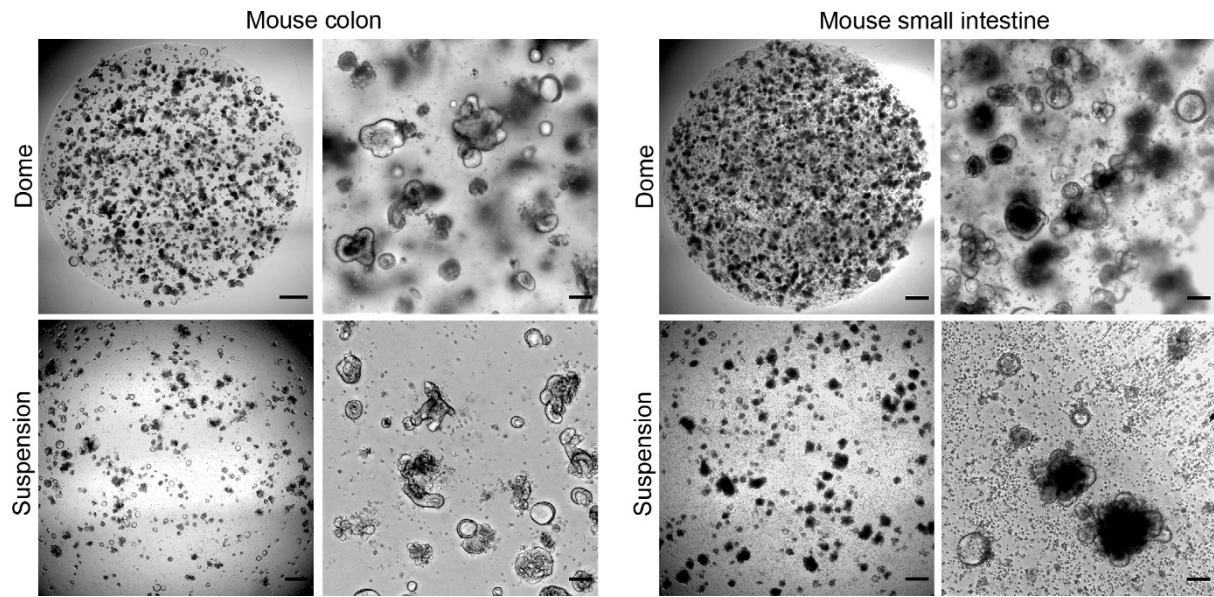

**Supplementary Fig. 10. Low-viscosity suspension culture conditions support the growth of mouse intestinal organoids.** Representative images of colonic organoids and small intestinal organoids established in either LVM suspension or dome culture; low magnification scale bars, 500  $\mu\text{m}$ ; high magnification scale bars, 100  $\mu\text{m}$ .

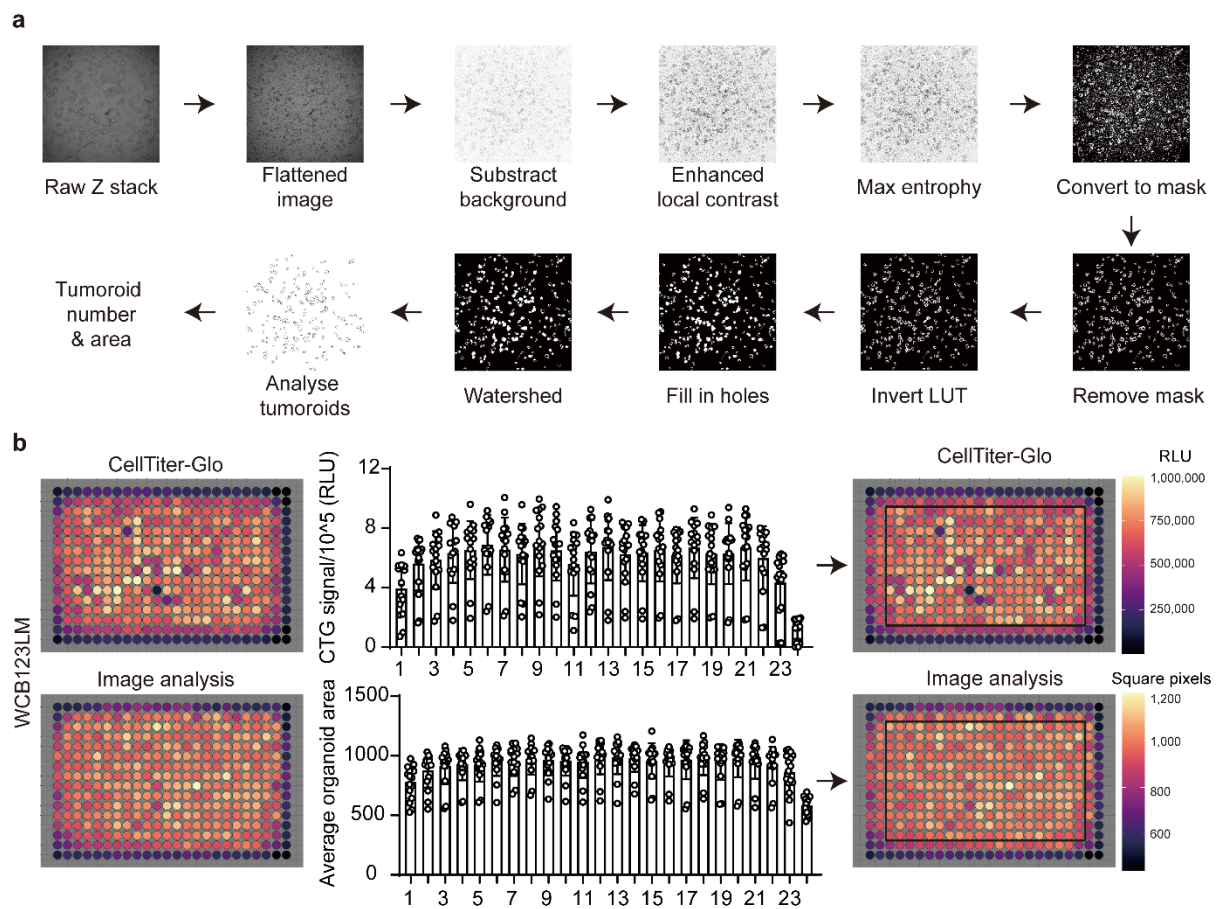

**Supplementary Fig. 11. Low-viscosity matrix suspension culture of intestinal tumoroids in 384-well format.** **a**, Overview of the image processing pipeline for determination of tumoroid sizes, including flattening of bright-field z-stack images, removal of background and identification of organoids. **b**, Assessment of plate edge effects for vehicle treated tumoroids after 10 days in culture. Mean tumoroid size and CellTiterGlo 3D luminescence signals were used for generating plate heatmaps; areas used for drug screen assays are marked with black boxes. Data are plotted as for each column as mean  $\pm$  s.d. LM, liver metastasis.



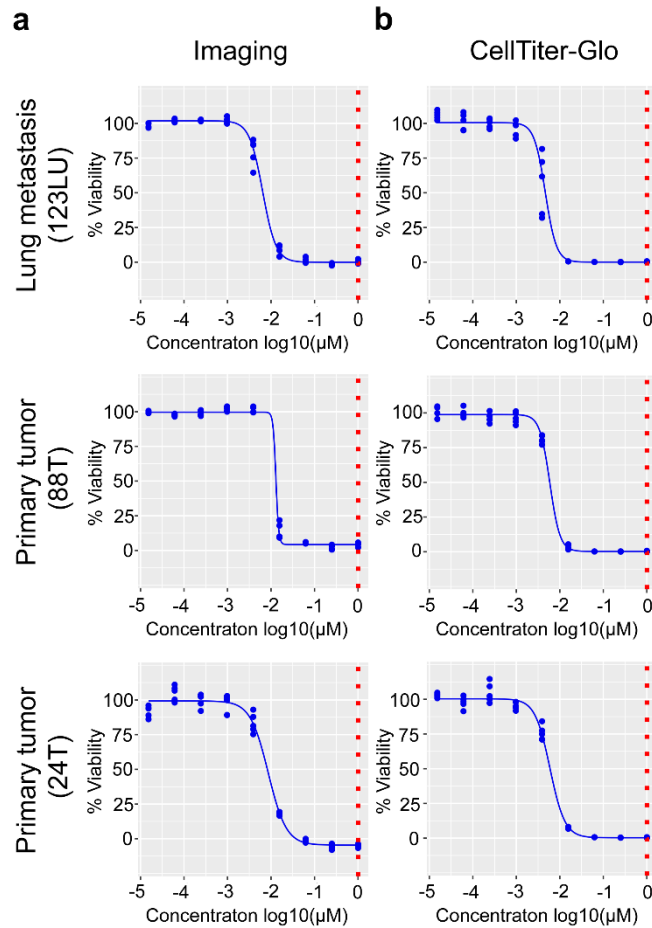

**Supplementary Fig. 12. Inhibition of colorectal tumoroid growth using the proteasome inhibitor bortezomib. a-b,** Three independent tumoroids were assayed in five replicate drug titrations and four-parameter logistic regression was used to fit drug dose-response curves to percentage viability values determined from (a) mean tumoroid size measurements by image analysis and (b) luminescence measurements by CellTiterGlo 3D assays. The bortezomib concentration of  $1\mu\text{M}$  was selected as positive (killing) control, indicated by the dashed red line.

## SUPPLEMENTARY TABLES

**Supplementary Table 1. Propagation rates for organoids and tumoroids derived from 62 normal colorectal and 54 cancer tissues grown in LVM suspension or Matrigel dome culture.** Statistical significance was attributed to values of  $p < 0.05$  as determined by the Fisher's exact test.

| Propagation |                        | Dome culture |      |                  |         | LVM suspension culture |    |                  |         | Dome vs Suspension |  |
|-------------|------------------------|--------------|------|------------------|---------|------------------------|----|------------------|---------|--------------------|--|
| Type        | Characteristic         | Yes          | No   | Success rate (%) | P value | Yes                    | No | Success rate (%) | P value | P value            |  |
| Organoid    | <b>Site</b>            |              |      |                  |         |                        |    |                  |         |                    |  |
|             | Right                  | 16           | 2    | 88.9             | 0.207   | 13                     | 2  | 86.7             | 1.000   | 1.000              |  |
|             | Left/Rectum            | 21           | 0    | 100.0            |         | 7                      | 1  | 87.5             |         | 0.276              |  |
| Tumoroid    | <b>Site</b>            |              |      |                  |         |                        |    |                  |         |                    |  |
|             | Right                  | 10           | 1    | 90.9             | 1.000   | 7                      | 4  | 63.6             | 0.667   | 0.311              |  |
|             | Left/Rectum            | 9            | 2    | 81.8             |         | 9                      | 3  | 75.0             |         | 1.000              |  |
|             | <b>Stage</b>           |              |      |                  |         |                        |    |                  |         |                    |  |
|             | I-III                  | 19           | 3    | 86.4             | 1.000   | 14                     | 4  | 77.8             | 0.277   | 0.680              |  |
|             | IV (incl. metastasis)  | 3            | 0    | 100.0            |         | 8                      | 0  | 100.0            |         | 1.000              |  |
|             | <b>Differentiation</b> |              |      |                  |         |                        |    |                  |         |                    |  |
|             | Well/Moderate          | 16           | 1    | 94.1             | 0.352   | 15                     | 6  | 71.4             | 0.318   | 0.104              |  |
| Poor        | 3                      | 1            | 75.0 |                  | 0       | 1                      | 0  |                  | 0.400   |                    |  |

**Supplementary Table 2. Propagation times for organoids and tumoroids derived from 62 normal colorectal and 54 cancer tissues grown in LVM suspension or Matrigel dome culture.** Statistical significance was attributed to values of  $p < 0.05$  as determined by the Student's t test.

| Propagation |                       | Dome culture |             |      |         | LVM suspension culture |             |      |         | Dome vs Suspension |  |
|-------------|-----------------------|--------------|-------------|------|---------|------------------------|-------------|------|---------|--------------------|--|
| Type        | Characteristic        | N            | Mean (days) | S.D. | P value | N                      | Mean (days) | S.D. | P value | P value            |  |
| Organoid    | Site                  |              |             |      |         |                        |             |      |         |                    |  |
|             | Right                 | 16           | 20.2        | 11.7 | 0.949   | 13                     | 25.5        | 10.5 | 0.181   | 0.233              |  |
|             | Left/Rectum           | 21           | 20.4        | 10.2 |         | 7                      | 18.7        | 8.4  |         | 0.702              |  |
| Tumoroid    | Site                  |              |             |      |         |                        |             |      |         |                    |  |
|             | Right                 | 10           | 23.5        | 10.7 | 0.626   | 7                      | 21.7        | 9.0  | 0.732   | 0.739              |  |
|             | Left/Rectum           | 9            | 20.8        | 11.9 |         | 9                      | 23.9        | 13.2 |         | 0.628              |  |
|             | Stage                 |              |             |      |         |                        |             |      |         |                    |  |
|             | I-III                 | 19           | 22.2        | 11.4 | 0.450   | 14                     | 22.6        | 11.5 | 0.534   | 0.918              |  |
|             | IV (incl. metastasis) | 3            | 28.7        | 19.8 |         | 8                      | 25.8        | 8.6  |         | 0.765              |  |
|             | Differentiation       |              |             |      |         |                        |             |      |         |                    |  |
|             | Well/Moderate         | 16           | 20.5        | 10.6 | 0.145   | 15                     | 23.9        | 11.3 | N/A     | 0.407              |  |
| Poor        | 3                     | 31.3         | 10.9        |      | 0       | N/A                    | N/A         |      | N/A     |                    |  |



**Supplementary Table 3. Establishment rates for organoids and tumoroids derived from 122 normal colorectal tissues and 91 cancer tissues grown in LVM suspension or Matrigel donut culture.** Statistical significance was attributed to values of  $p < 0.05$  as determined by the Fisher's exact test. \* $p < 0.05$

| Establishment |                        | Donut culture |      |                  |         | LVM suspension culture |     |                  |         | Donut vs Suspension |
|---------------|------------------------|---------------|------|------------------|---------|------------------------|-----|------------------|---------|---------------------|
| Type          | Characteristic         | Yes           | No   | Success rate (%) | P value | Yes                    | No  | Success rate (%) | P value | P value             |
| Organoid      | <b>Site</b>            |               |      |                  |         |                        |     |                  |         |                     |
|               | Right                  | 44            | 6    | 88.0             | 0.506   | 15                     | 1   | 93.8             | 1.000   | 1.000               |
|               | Left/Rectum            | 38            | 3    | 92.7             |         | 14                     | 1   | 93.3             |         | 1.000               |
| Tumoroid      | <b>Site</b>            |               |      |                  |         |                        |     |                  |         |                     |
|               | Right                  | 22            | 17   | 56.4             | 0.006*  | 5                      | 1   | 83.3             | 1.000   | 0.377               |
|               | Left/Rectum            | 24            | 3    | 88.9             |         | 6                      | 2   | 75.0             |         | 0.568               |
|               | <b>Stage</b>           |               |      |                  |         |                        |     |                  |         |                     |
|               | I-III                  | 43            | 19   | 69.4             | 0.330   | 10                     | 3   | 76.9             | 1.000   | 0.744               |
|               | IV (incl. metastasis)  | 11            | 2    | 84.6             |         | 2                      | 1   | 66.7             |         | 0.489               |
|               | <b>Differentiation</b> |               |      |                  |         |                        |     |                  |         |                     |
|               | Well/Moderate          | 40            | 16   | 71.4             | 0.440   | 10                     | 3   | 76.9             | 1.000   | 1.000               |
| Poor          | 5                      | 4             | 55.6 |                  | 1       | 0                      | 100 |                  | 1.000   |                     |

**Supplementary Table 4. Establishment times for organoids and tumoroids derived from 122 normal colorectal tissues and 91 cancer tissues grown in LVM suspension or Matrigel donut culture.** Statistical significance was attributed to values of  $p < 0.05$  as determined by the Student's t test. \* $p < 0.05$

| Establishment |                       | Donut culture |             |      |         | LVM suspension culture |             |      |         | Donut vs Suspension |  |
|---------------|-----------------------|---------------|-------------|------|---------|------------------------|-------------|------|---------|---------------------|--|
| Type          | Characteristic        | N             | Mean (days) | S.D. | P value | N                      | Mean (days) | S.D. | P value | P value             |  |
| Organoid      | Site                  |               |             |      |         |                        |             |      |         |                     |  |
|               | Right                 | 44            | 6.2         | 3.2  | 0.059   | 15                     | 18.6        | 12.8 | 0.270   | <0.001*             |  |
|               | Left/Rectum           | 38            | 7.7         | 3.9  |         | 14                     | 14.1        | 7.1  |         | <0.001*             |  |
| Tumoroid      | Site                  |               |             |      |         |                        |             |      |         |                     |  |
|               | Right                 | 22            | 14.6        | 7.8  | 0.871   | 5                      | 23.4        | 17.0 | 0.646   | 0.106               |  |
|               | Left/Rectum           | 24            | 14.2        | 10.9 |         | 6                      | 19.5        | 6.0  |         | 0.272               |  |
|               | Stage                 |               |             |      |         |                        |             |      |         |                     |  |
|               | I-III                 | 43            | 14.6        | 9.7  | 0.452   | 10                     | 22.8        | 12.0 | 0.101   | 0.030*              |  |
|               | IV (incl. metastasis) | 11            | 12.1        | 9.7  |         | 2                      | 6.0         | 0.0  |         | 0.432               |  |
|               | Differentiation       |               |             |      |         |                        |             |      |         |                     |  |
|               | Well/Moderate         | 40            | 13.7        | 9.2  | 0.216   | 10                     | 22.8        | 12.0 | N/A     | 0.013*              |  |
| Poor          | 5                     | 19.4          | 11.5        |      | 1       | 6.0                    | 0.0         |      | N/A     |                     |  |

**Supplementary Table 5. Performance metrics for plate uniformity for colorectal tumoroids assessed using image analysis.** Plate uniformity in 384-well format was evaluated for three different tumoroids for maximum (Max) signals, minimum (Min) signals, and drug dose-dependent midpoint (Mid) signals based on organoid size measurements with the latter reported for each side of each plate (left and right). CV, coefficient of variation; S.D. standard deviation; SW, signal window; Z', Z' factor. N = 228 for Max (Max plates) and Min (Min plates). N = 12 for Max (Min plates), Min (Max plates), and Mid (Mid plates, left and right). N = 6 for Max (Mid plates left and right), Min (Mid plates, left and right).

| Imaging     |             |            |             |      |     |      |                |                            |                                   |     |
|-------------|-------------|------------|-------------|------|-----|------|----------------|----------------------------|-----------------------------------|-----|
| Sample ID   | Plate       | Type       | Mean (size) | S.D. | CV  | SW   | Z' (robust Z') | Mean ED <sub>50</sub> (μM) | Mean ED <sub>50</sub> Fold Change |     |
| WCB024T     | Mid (Left)  | Max        | 942         | 38   | 4.0 | 10.9 | 0.73 (0.82)    | 1.54                       | 1.5                               |     |
|             |             | Min        | 376         | 13   | 3.5 |      |                |                            |                                   |     |
|             |             | 0.78 uM    | 699         | 69   | 9.8 |      |                |                            |                                   |     |
|             | Mid (Right) | Max        | 963         | 37   | 3.8 | 13.1 | 0.78 (0.73)    | 2.28                       |                                   |     |
|             |             | Min        | 353         | 8    | 2.2 |      |                |                            |                                   |     |
|             |             | 0.78 uM    | 730         | 53   | 7.3 |      |                |                            |                                   |     |
|             | Max         | Max        | Max         | 714  | 42  | 5.9  | 4.3            | 0.51 (0.55)                |                                   |     |
|             |             |            | Min         | 361  | 15  | 4.1  |                |                            |                                   |     |
|             |             | Min        | Max         | 809  | 39  | 4.8  | 4.7            | 0.48 (0.50)                |                                   |     |
|             |             |            | Min         | 427  | 35  | 6.1  |                |                            |                                   |     |
|             | WCB088T     | Mid (Left) | Max         | 623  | 22  | 3.5  | 8.2            | 0.59 (0.60)                | 6.09                              | 1.7 |
|             |             |            | Min         | 325  | 19  | 5.8  |                |                            |                                   |     |
| 12.50 uM    |             |            | 395         | 17   | 4.4 |      |                |                            |                                   |     |
| Mid (Right) |             | Max        | 617         | 25   | 4.1 | 7.1  | 0.61 (0.80)    | 10.15                      |                                   |     |
|             |             | Min        | 326         | 13   | 4.1 |      |                |                            |                                   |     |
|             |             | 12.50 uM   | 441         | 27   | 6.2 |      |                |                            |                                   |     |
| Max         |             | Max        | Max         | 722  | 30  | 4.1  | 6.4            | 0.55 (0.60)                |                                   |     |
|             |             |            | Min         | 378  | 22  | 5.8  |                |                            |                                   |     |
|             |             | Min        | Max         | 736  | 31  | 4.3  | 6.1            | 0.54 (0.64)                |                                   |     |
|             |             |            | Min         | 378  | 25  | 6.1  |                |                            |                                   |     |
| WCB123LU    |             | Mid (Left) | Max         | 934  | 45  | 4.8  | 7.5            | 0.55 (0.68)                | 1.23                              | 1.3 |
|             |             |            | Min         | 315  | 49  | 15.4 |                |                            |                                   |     |
|             | 0.78 uM     |            | 661         | 35   | 5.3 |      |                |                            |                                   |     |
|             | Mid (Right) | Max        | 900         | 17   | 1.9 | 29.0 | 0.82 (0.82)    | 1.56                       |                                   |     |
|             |             | Min        | 286         | 18   | 6.5 |      |                |                            |                                   |     |
|             |             | 0.78 uM    | 673         | 32   | 4.7 |      |                |                            |                                   |     |
|             | Max         | Max        | Max         | 1052 | 46  | 4.4  | 10.8           | 0.67 (0.75)                |                                   |     |
|             |             |            | Min         | 303  | 37  | 12.3 |                |                            |                                   |     |
|             |             | Min        | Max         | 898  | 41  | 4.5  | 8.8            | 0.61 (0.60)                |                                   |     |
|             |             |            | Min         | 302  | 27  | 12.2 |                |                            |                                   |     |



**Supplementary Table 6. Performance metrics for plate uniformity for colorectal tumoroids assessed using CellTitre-Glo 3D assays.** Plate uniformity in 384-well format was evaluated for three different tumoroids for maximum (Max) signals, minimum (Min) signals, and drug dose-dependent midpoint (Mid) signals based on fluorescence measurements with the latter reported for each side of each plate (left and right). CV, coefficient of variation; S.D. standard deviation; SW, signal window; Z', Z' factor. N = 228 for Max (Max plates) and Min (Min plates). N = 12 for Max (Min plates), Min (Max plates), and Mid (Mid plates, left and right). N = 6 for Max (Mid plates left and right), Min (Mid plates, left and right).

| CellTitre-Glo 3D |             |            |                  |         |        |      |                |                            |                                   |     |
|------------------|-------------|------------|------------------|---------|--------|------|----------------|----------------------------|-----------------------------------|-----|
| Sample ID        | Plate       | Type       | Mean (intensity) | S.D.    | CV     | SW   | Z' (robust Z') | Mean ED <sub>50</sub> (μM) | Mean ED <sub>50</sub> Fold Change |     |
| WCB024T          | Mid (Left)  | Max        | 695975           | 100078  | 14.4   | 3.9  | 0.56 (0.71)    | 3.69                       | 1.4                               |     |
|                  |             | Min        | 2323             | 1130    | 48.7   |      |                |                            |                                   |     |
|                  |             | 3.13 μM    | 350277           | 85107   | 24.3   |      |                |                            |                                   |     |
|                  | Mid (Right) | Max        | 863768           | 123802  | 14.3   | 3.9  | 0.56 (0.73)    | 5.15                       |                                   |     |
|                  |             | Min        | 7667             | 2244    | 29.3   |      |                |                            |                                   |     |
|                  |             | 3.13 μM    | 424756           | 82633   | 19.5   |      |                |                            |                                   |     |
|                  | Max         | Max        | 323298           | 47655   | 14.7   | 3.7  | 0.55 (0.51)    |                            |                                   |     |
|                  |             | Min        | 2730             | 376     | 13.8   |      |                |                            |                                   |     |
|                  |             | Min        | Max              | 860127  | 169492 | 19.7 | 2.1            | 0.41 (0.40)                |                                   |     |
|                  | WCB088T     | Mid (Left) | Max              | 1408517 | 256294 | 18.2 | 2.5            | 0.45 (0.35)                | 1.98                              | 1.7 |
|                  |             |            | Min              | 1908    | 1468   | 76.9 |                |                            |                                   |     |
|                  |             |            | 3.13 μM          | 544057  | 159171 | 29.3 |                |                            |                                   |     |
| Mid (Right)      |             | Max        | 1516397          | 124227  | 8.2    | 9.0  | 0.75 (0.76)    | 3.41                       |                                   |     |
|                  |             | Min        | 13263            | 3172    | 23.9   |      |                |                            |                                   |     |
|                  |             | 3.13 μM    | 873049           | 183175  | 21.0   |      |                |                            |                                   |     |
| Max              |             | Max        | 1921444          | 341406  | 17.8   | 2.6  | 0.46 (0.44)    |                            |                                   |     |
|                  |             | Min        | 13318            | 2439    | 18.3   |      |                |                            |                                   |     |
|                  |             | Min        | Max              | 1797946 | 320976 | 17.9 | 2.6            | 0.46 (0.39)                |                                   |     |
| WCB123LU         |             | Mid (Left) | Max              | 735969  | 161089 | 21.9 | 1.5            | 0.34 (0.71)                | 1.01                              | 1.1 |
|                  |             |            | Min              | 1040    | 927    | 89.2 |                |                            |                                   |     |
|                  |             |            | 0.78 μM          | 434300  | 78260  | 18.0 |                |                            |                                   |     |
|                  | Mid (Right) | Max        | 809775           | 115061  | 14.2   | 3.9  | 0.56 (0.60)    | 1.10                       |                                   |     |
|                  |             | Min        | 8079             | 2339    | 29.0   |      |                |                            |                                   |     |
|                  |             | 0.78 μM    | 475470           | 125155  | 26.3   |      |                |                            |                                   |     |
|                  | Max         | Max        | 1253442          | 300265  | 24.0   | 1.1  | 0.27 (0.16)    |                            |                                   |     |
|                  |             | Min        | 8687             | 1478    | 17.0   |      |                |                            |                                   |     |
|                  |             | Min        | Max              | 1299146 | 198646 | 15.3 | 3.5            | 0.54 (0.77)                |                                   |     |
|                  |             |            | Min              | 340     | 62     | 27.2 |                |                            |                                   |     |
