# Supplementary material for: Low-viscosity matrix suspension culture enables scalable analysis of patient-derived organoids and tumoroids from the large intestine
Source: PubMed Central journal article supplement (PMC8438070; doi:10.1038/s42003-021-02607-y), 2021-09-13
Supplement: 42003_2021_2607_MOESM2_ESM.pdf [file 42003_2021_2607_MOESM2_ESM.pdf]

## Description of Additional Supplementary Files

**File name:** Supplementary Data 1.

**Description:** Source data underlying Fig. 1a, Fig. 1b, Fig. 2b, Fig. 2f, Fig. 2g, Fig. 3c, Fig. 6b, Fig. 6f, Fig. 6g, Fig. 7c, Supplementary Fig. 11b.
